# Supplementary material
Source: Springer Nature journal article supplement (https://www.springermedizin.de/resource/supplementary/12947_2008_238_MOESM3_ESM.pdf/9556524)

# DIASTOLIC DYSFUNCTION CLASSIFICATION

Normal Diastolic  
Function Pattern

Relaxation Deficit  
Pattern

Pseudonormal  
Pattern

Restrictive  
Pattern

Mitral Flow

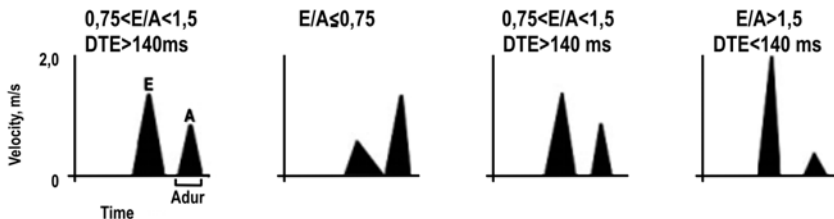

Pulmonay Flow

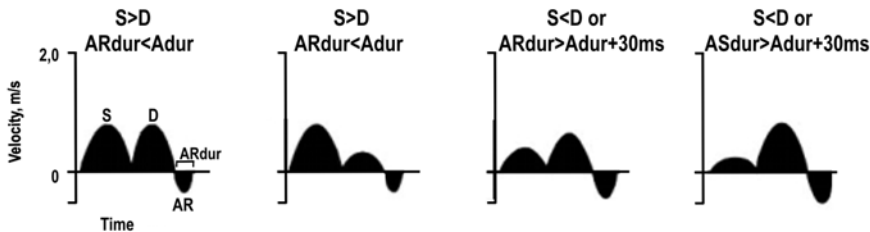

Tissue Doppler

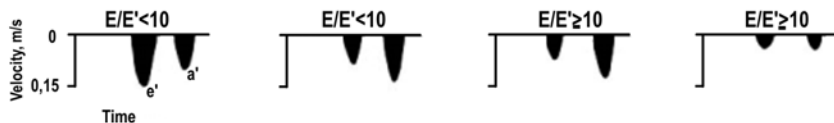

Supplement: MOESM3 [file 9556524]
